# Supplementary material
Source: PubMed Central journal article supplement (PMC5741091)
Supplement: NIHMS918569-supplement-8.pdf [file NIHMS918569-supplement-8.pdf]

**Table S1. Dose comparison between monotherapy and combination arms of clinical trials analyzed. Related to Figures 1, 4, and S5.**

| Treatment                                                                                                                         | Arm #1 dose                                                                                                                                                            | Arm #2 dose                                                                                                                                                                                                                                   | Combination dose                                                                                                                                                       | Dose comparison                                                                                                                                                               |
|-----------------------------------------------------------------------------------------------------------------------------------|------------------------------------------------------------------------------------------------------------------------------------------------------------------------|-----------------------------------------------------------------------------------------------------------------------------------------------------------------------------------------------------------------------------------------------|------------------------------------------------------------------------------------------------------------------------------------------------------------------------|-------------------------------------------------------------------------------------------------------------------------------------------------------------------------------|
| <b>Figure 1, Untreated metastatic melanoma, ipilimumab plus nivolumab (Larkin et al., 2015)</b>                                   |                                                                                                                                                                        |                                                                                                                                                                                                                                               |                                                                                                                                                                        |                                                                                                                                                                               |
| Ipilimumab                                                                                                                        | 4 cycles of<br>3 mg/kg every 3 weeks                                                                                                                                   |                                                                                                                                                                                                                                               | 4 cycles of<br>3 mg/kg every 3 weeks                                                                                                                                   | No difference in design                                                                                                                                                       |
| Nivolumab                                                                                                                         |                                                                                                                                                                        | 3 mg/kg every 2 weeks                                                                                                                                                                                                                         | First 2 cycles of<br>1 mg/kg every 3 weeks<br>Second 2 cycles of<br>3 mg/kg every 3 weeks<br>Followed by maintenance<br>3 mg/kg every 2 weeks                          | 67% reduction during first 2 cycles,<br>No difference in dose in cycles 3, 4, and during maintenance.                                                                         |
| <b>Figure 4A, Recurrent platinum sensitive ovarian cancer, chemotherapy plus olaparib (Liu et al., 2014; Oza et al., 2015)</b>    |                                                                                                                                                                        |                                                                                                                                                                                                                                               |                                                                                                                                                                        |                                                                                                                                                                               |
| Paclitaxel                                                                                                                        | 6 cycles of<br>175 mg/m <sup>2</sup> every 3 weeks                                                                                                                     |                                                                                                                                                                                                                                               | 6 cycles of<br>175 mg/m <sup>2</sup> every 3 weeks                                                                                                                     | No difference in design                                                                                                                                                       |
| Carboplatin                                                                                                                       | 6 cycles of<br>AUC = 6 mg/mL/min every 3 weeks                                                                                                                         |                                                                                                                                                                                                                                               | 6 cycles of<br>AUC = 4 mg/mL/min every 3 weeks                                                                                                                         | 33% reduction in dose                                                                                                                                                         |
| Olaparib                                                                                                                          |                                                                                                                                                                        | 400 mg twice daily until progression                                                                                                                                                                                                          | During chemotherapy cycles<br>200 mg twice daily, followed by<br>400 mg twice daily until progression                                                                  | 50% reduction in dose during chemotherapy cycles, followed by a maintenance dose which is equal to the monotherapy arm.                                                       |
| <b>Figure 4B, HER2-positive metastatic breast cancer, chemotherapy plus trastuzumab (Slamon et al., 2001; Vogel et al., 2002)</b> |                                                                                                                                                                        |                                                                                                                                                                                                                                               |                                                                                                                                                                        |                                                                                                                                                                               |
| Anthracycline                                                                                                                     | 6 cycles of 60mg/m <sup>2</sup> doxorubicin or 75mg/m <sup>2</sup> epirubicin every 3 weeks                                                                            |                                                                                                                                                                                                                                               | 6 cycles of 60mg/m <sup>2</sup> doxorubicin or 75mg/m <sup>2</sup> epirubicin every 3 weeks                                                                            | No difference in design                                                                                                                                                       |
| Cyclophosphamide                                                                                                                  | 6 cycles of<br>600 mg/m <sup>2</sup> every 3 weeks                                                                                                                     |                                                                                                                                                                                                                                               | 6 cycles of<br>600 mg/m <sup>2</sup> every 3 weeks                                                                                                                     | No difference in design                                                                                                                                                       |
| Paclitaxel (in place of AC for patients who received adjuvant anthracycline)                                                      | 6 cycles of<br>175 mg/m <sup>2</sup> every 3 weeks                                                                                                                     |                                                                                                                                                                                                                                               | 6 cycles of<br>175 mg/m <sup>2</sup> every 3 weeks                                                                                                                     | No difference in design                                                                                                                                                       |
| Trastuzumab                                                                                                                       |                                                                                                                                                                        | Loading dose of 4 mg/kg, followed by 2 mg/kg weekly (52% of patients), or loading dose of 8 mg/kg, followed by 4 mg/kg weekly (48% of patients). No statistically significant difference in response rate and overall survival between doses. | Loading dose of 4 mg/kg, followed by 2 mg/kg weekly                                                                                                                    | 48% of patients in trastuzumab monotherapy study received double dose, but this change produced no statistically significant difference in response rate or overall survival. |
| <b>Figure 4C, Advanced pancreatic cancer, gemcitabine plus erlotinib (Moore et al., 2007; Renouf et al., 2014)</b>                |                                                                                                                                                                        |                                                                                                                                                                                                                                               |                                                                                                                                                                        |                                                                                                                                                                               |
| Gemcitabine                                                                                                                       | 1,000 mg/m <sup>2</sup> on days 1, 8, 15, 22, 29, 36, and 43 followed by a 1-week rest in cycle one (8 weeks), and on days 1, 8 and 15 in all subsequent 4-week cycles |                                                                                                                                                                                                                                               | 1,000 mg/m <sup>2</sup> on days 1, 8, 15, 22, 29, 36, and 43 followed by a 1-week rest in cycle one (8 weeks), and on days 1, 8 and 15 in all subsequent 4-week cycles | No difference in design                                                                                                                                                       |
| Erlotinib                                                                                                                         |                                                                                                                                                                        | 150 mg/day. Dose-escalation to 200-300 mg/day possible in 9 of 49 patients.                                                                                                                                                                   | 100 to 150 mg/day. 100 mg/day in initial safety evaluation phase, increased to 150 mg/day in subsequent cohorts.                                                       | Majority of patients have dose difference ≤ 33%. Only 9 patients receiving Erlotinib monotherapy have 50% or more dose difference.                                            |
| <b>Figure 4D, BRAF-mutant metastatic melanoma, dabrafenib plus trametinib (Kim et al., 2013; Long et al., 2014)</b>               |                                                                                                                                                                        |                                                                                                                                                                                                                                               |                                                                                                                                                                        |                                                                                                                                                                               |
| Dabrafenib                                                                                                                        | 150 mg twice daily                                                                                                                                                     |                                                                                                                                                                                                                                               | 150 mg twice daily                                                                                                                                                     | No difference in design                                                                                                                                                       |
| Trametinib                                                                                                                        |                                                                                                                                                                        | 2 mg once daily                                                                                                                                                                                                                               | 2 mg once daily                                                                                                                                                        | No difference in design                                                                                                                                                       |

**Figure 4E, Recurrent platinum-sensitive ovarian cancer, chemotherapy plus bevacizumab (Aghajanian et al., 2012; Burger et al., 2007)**

|             |                                                                                              |                        |                                                                                              |                         |
|-------------|----------------------------------------------------------------------------------------------|------------------------|----------------------------------------------------------------------------------------------|-------------------------|
| Gemcitabine | 6 cycles (up to 10 if responding) of 1000 mg/m <sup>2</sup> on days 1 and 8 of every 3 weeks |                        | 6 cycles (up to 10 if responding) of 1000 mg/m <sup>2</sup> on days 1 and 8 of every 3 weeks | No difference in design |
| Carboplatin | 6 cycles (up to 10 if responding) of AUC = 4 mg/mL/min every 3 weeks                         |                        | 6 cycles (up to 10 if responding) of AUC = 4 mg/mL/min every 3 weeks                         | No difference in design |
| Bevacizumab |                                                                                              | 15 mg/kg every 21 days | 15 mg/kg every 21 days                                                                       | No difference in design |

**Figure 4F, Previously treated colorectal cancer, FOLFOX4 plus bevacizumab (Giantonio et al., 2007)**

|                |                                                                                                |                         |                                                                                                |                         |
|----------------|------------------------------------------------------------------------------------------------|-------------------------|------------------------------------------------------------------------------------------------|-------------------------|
| Oxaliplatin    | Every 2 weeks, 85 mg/m <sup>2</sup>                                                            |                         | Every 2 weeks, 85 mg/m <sup>2</sup>                                                            | No difference in design |
| Leucovorin     | Every 2 weeks, 200 mg/m <sup>2</sup> on days 1 and 2                                           |                         | Every 2 weeks, 200 mg/m <sup>2</sup> on days 1 and 2                                           | No difference in design |
| 5-Fluorouracil | Every 2 weeks, 400 mg/m <sup>2</sup> bolus then 600 mg/m <sup>2</sup> infusion on days 1 and 2 |                         | Every 2 weeks, 400 mg/m <sup>2</sup> bolus then 600 mg/m <sup>2</sup> infusion on days 1 and 2 | No difference in design |
| Bevacizumab    |                                                                                                | Every 2 weeks, 10 mg/kg | Every 2 weeks, 10 mg/kg                                                                        | No difference in design |

**Figure 4G, Advanced pancreatic cancer, 5-fluorouracil plus oxaliplatin (Ducreux et al., 2004)**

|                |                                                        |                                      |                                                        |                         |
|----------------|--------------------------------------------------------|--------------------------------------|--------------------------------------------------------|-------------------------|
| 5-Fluorouracil | Every 3 weeks, 1000 mg/m <sup>2</sup> /day on days 1-4 |                                      | Every 3 weeks, 1000 mg/m <sup>2</sup> /day on days 1-4 | No difference in design |
| Oxaliplatin    |                                                        | Every 3 weeks, 130 mg/m <sup>2</sup> | Every 3 weeks, 130 mg/m <sup>2</sup>                   | No difference in design |

**Figure 4H, KRAS-wildtype metastatic colorectal carcinoma, chemotherapy plus cetuximab (Bokemeyer et al., 2009; Bokemeyer et al., 2012; Karapetis et al., 2008; Van Cutsem et al., 2009)**

|                         |                                                                                                                                                                                                            |                                                                                 |                                                                                                                                                                                                            |                         |
|-------------------------|------------------------------------------------------------------------------------------------------------------------------------------------------------------------------------------------------------|---------------------------------------------------------------------------------|------------------------------------------------------------------------------------------------------------------------------------------------------------------------------------------------------------|-------------------------|
| FOLFIRI (CRYSTAL trial) | Every 2 weeks: Irinotecan 180 mg/m <sup>2</sup> ; leucovorin 200 mg/m <sup>2</sup> L-form, or 400 mg/m <sup>2</sup> racemic; fluorouracil 400 mg/m <sup>2</sup> bolus then 2400 mg/m <sup>2</sup> infusion |                                                                                 | Every 2 weeks: Irinotecan 180 mg/m <sup>2</sup> ; leucovorin 200 mg/m <sup>2</sup> L-form, or 400 mg/m <sup>2</sup> racemic; fluorouracil 400 mg/m <sup>2</sup> bolus then 2400 mg/m <sup>2</sup> infusion | No difference in design |
| FOLFOX-4 (OPUS trial)   | Every 2 weeks: Oxaliplatin 85 mg/m <sup>2</sup> ; leucovorin 200 mg/m <sup>2</sup> ; fluorouracil 400 mg/m <sup>2</sup> bolus then 600 mg/m <sup>2</sup> infusion on days 1 and 2                          |                                                                                 | Every 2 weeks: Oxaliplatin 85 mg/m <sup>2</sup> ; leucovorin 200 mg/m <sup>2</sup> ; fluorouracil 400 mg/m <sup>2</sup> bolus then 600 mg/m <sup>2</sup> infusion on days 1 and 2                          | No difference in design |
| Cetuximab               |                                                                                                                                                                                                            | Loading dose of 400mg/m <sup>2</sup> , followed by 250 mg/m <sup>2</sup> weekly | Loading dose of 400mg/m <sup>2</sup> , followed by 250 mg/m <sup>2</sup> weekly                                                                                                                            | No difference in design |

**Supplementary Figure S5B, Low grade oligodendroglioma, chemotherapy plus radiation (Buckner et al., 2016; Taal et al., 2015)**

|              |                                                                   |                                                          |                                                                   |                                                            |
|--------------|-------------------------------------------------------------------|----------------------------------------------------------|-------------------------------------------------------------------|------------------------------------------------------------|
| Procarbazine | 6 cycles of 60 mg/m <sup>2</sup> on days 8-21, every 6 weeks      |                                                          | 6 cycles of 60 mg/m <sup>2</sup> on days 8-21, every 8 weeks      | No difference in dose, but 8 week instead of 6 week cycles |
| Lomustine    | 6 cycles of 110 mg/m <sup>2</sup> , on day 1, every 6 weeks       |                                                          | 6 cycles of 110 mg/m <sup>2</sup> , on day 1, every 8 weeks       | No difference in dose, but 8 week instead of 6 week cycles |
| Vincristine  | 6 cycles of 1.4 mg/m <sup>2</sup> on days 8 and 29, every 6 weeks |                                                          | 6 cycles of 1.4 mg/m <sup>2</sup> on days 8 and 29, every 8 weeks | No difference in dose, but 8 week instead of 6 week cycles |
| Radiation    |                                                                   | 54 Gy total, in 30 fractions of 1.8 Gy each over 6 weeks | 54 Gy total, in 30 fractions of 1.8 Gy each over 6 weeks          | No difference in design                                    |
